# Supplementary material for: Developmental Characteristics and Auxin Response of Epiphytic Root in Dendrobium catenatum
Source: Front Plant Sci. 2022 Jun 23;13:935540. doi: 10.3389/fpls.2022.935540 (PMC9260429; doi:10.3389/fpls.2022.935540)
Supplement: Supplementary file 3 [file Data_Sheet_1.xlsx]

## Sheet: Table S1
GeneID	NAA_0a	NAA_0b	NAA_0c	NAA_5a	NAA_5b	NAA_5c	NAA_10a	NAA_10b	NAA_10c	NAA_20a	NAA_20b	NAA_20c
GH3.1_110114753	11.5407	6.91976	12.0106	9.885	8.26979	10.5034	25.8784	268.233	16.6233	134.624	137.102	193.581
GH3.8_110103533	2.62222	0.765976	0.416399	2.07619	0.944023	1.4008	30.4767	22.3963	36.6705	28.0381	23.6776	30.4958
PIN1_110114140	36.3209	17.9969	28.9781	28.663	37.6745	32.9195	27.1602	49.7905	32.4335	92.0517	76.3094	77.3209
PIN2_110102000	4.16382	6.64415	2.72876	2.93444	2.51955	2.49322	4.47065	14.6726	4.02757	22.0523	16.7273	44.1557
ABCB11_110106134	6.65691	4.61687	8.02034	7.45332	5.97008	6.64463	7.59542	8.78923	8.05936	15.7646	13.6341	19.4857
ABCB21_110098661	1.20425	1.04495	1.25259	2.47182	2.63107	2.8344	1.29531	0.86361	1.39973	0.994367	0.642587	0.478972
LAX2_110104313	9.96649	3.61268	4.81818	8.88215	13.2058	8.72093	3.87699	8.36531	5.59434	44.1485	28.9993	30.0054
LAX3_110112324	2.08051	0.855041	2.48345	4.74045	6.43515	4.37579	1.41112	2.44101	1.62681	0.052412	0.425795	0.0498449
AUX1_110094143	27.6192	27.6279	38.2792	43.2681	39.9187	39.2251	15.9537	22.5703	23.4881	12.4671	15.8	11.5244
ARF5_110101753	2.37058	1.90232	2.22232	2.16185	2.3111	2.28954	2.10458	2.33574	2.71294	6.6277	4.8201	5.28415
ARF6_110112646	13.3473	10.3191	10.5966	12.4386	13.9895	12.4032	8.36555	12.4125	9.00834	40.1102	38.3565	28.3546
ARF17_110104921	35.3204	34.3209	33.1787	36.456	37.805	29.9041	39.6912	44.1173	37.7955	78.8921	73.8012	75.8511
IAA4_110099414	88.453	96.4856	94.4347	69.6002	69.4913	70.5381	56.9901	101.807	41.921	133.402	152.216	198.588
IAA4_110107949	0.503533	0.446992	0.509128	0.5403	0.489682	0.239784	0.120539	0.681673	0.168741	2.68287	1.97088	2.17146
IAA8_110104229	1.24666	1.42023	1.0478	1.87276	1.75036	1.35059	1.09674	1.24046	1.36472	4.40231	4.21939	3.15177
IAA10_110101681	7.99178	7.97582	7.79899	8.24617	8.61392	8.67819	7.66987	19.4613	10.0363	23.4072	23.9652	26.9395
IAA10_110107373	5.60463	3.86967	5.46711	5.75686	5.62516	5.26946	4.45503	12.2566	5.28139	14.7111	12.1597	15.4004
WOX11_110107133	1.28715	0.977574	0.455509	1.79036	0.949242	1.21568	1.72551	3.57798	1.81164	4.28994	4.56389	4.07982
WOX12_110108675	0	0	0	0	0.0525403	0.0514551	0.0517326	0	0.0482799	0.587965	0.696591	0.792152
WOX5_110093208	1.59025	3.19705	2.89662	3.59118	4.69638	3.11823	0.862135	2.57075	0.731451	12.3967	7.01054	8.47149
KNAT1_110097810	0.4316	0.744986	0.127282	0.600333	0.612103	0.29973	4.21885	10.4978	5.73718	4.16701	7.47776	15.7974
KNAT6_110110822	1.90503	1.2186	0.79314	2.2913	1.38266	1.63426	2.67586	4.93801	1.75247	5.86907	5.41821	7.8227
LBD29_novel.878	0.164496	0.170363	0	0.274567	0.0699876	0.0685421	0.895852	0.467653	1.28625	6.00464	3.57909	6.76573
LBD33_novel.1203	0.0672709	0.06967	0	0	0.114486	0	0.507267	1.91247	0.0526012	1.44133	1.95156	3.40145
BBM_110103792	13.0636	5.0601	8.21606	10.1217	11.706	7.62354	6.27107	16.2873	8.45366	52.6028	48.2523	48.3788
PLT2_110112684	3.64602	1.62277	1.94609	2.69079	2.74355	1.65733	1.66627	3.65502	2.00273	10.521	9.51858	9.18707
ANT_110107204	0.415818	0.287098	0.39854	0.375948	0.324347	0.606418	0.145164	0.788096	0.514806	1.86983	2.31767	1.49059
ANT_110101314	0.171492	0.177608	0.216747	0.245351	0.145928	0.122498	0.102632	0.116081	0.0574692	1.1859	0.612011	0.942925
AIL5_110111594	37.6297	23.4001	23.3884	22.3038	22.1084	17.7276	49.3513	193.643	37.4339	113.839	100.258	155.147
AIL1_110094210	3.84403	2.29216	2.64515	1.62026	1.7181	2.10327	6.50651	16.3741	4.34166	11.3697	8.16666	16.9372
LRP1_110113281	2.57617	2.35209	2.60908	3.22499	1.81718	1.77964	7.12855	16.3824	7.766	11.0016	6.91089	16.8581
CYCA1.4_110103887	6.43369	2.71965	2.78794	4.67536	7.15054	4.92388	2.78691	3.6913	4.89382	15.2816	11.8857	8.19137
CYCB1.1_110096329	6.27556	1.67726	4.33425	5.5415	10.2667	6.00582	4.85091	7.55846	4.90706	20.5303	17.7489	13.597
CYCD2.1_110098325	1.72809	0.919047	1.69417	2.26077	2.86149	2.21856	2.23052	2.8769	2.59294	8.11675	6.17251	6.80276
CYCD3.2_110104947	4.58342	2.22102	2.75297	2.42145	2.21845	1.19144	2.78328	4.34346	2.86056	18.119	14.4353	16.4382
CSA5_110114259	146.514	180.782	223.361	249.732	237.126	279.471	94.567	120.687	128.311	80.4661	98.8866	81.3135
CSA9_110091796	31.6696	49.7289	54.6283	69.4631	68.6465	114.94	14.5383	27.9629	38.3018	3.02479	4.92079	2.18968
CSA14_110114279	33.6067	53.5155	60.9089	74.8679	75.3605	108.82	14.7297	28.5889	37.6552	2.63602	5.7451	2.08176
CSA7_110096275	53.8545	83.2445	120.92	123.12	119.367	191.064	32.3713	49.5045	68.6785	3.12182	7.47501	2.21887
CSLH1_110112323	1.59123	1.95222	1.88428	3.02374	2.68723	3.38656	3.48686	2.45907	2.33533	0.524512	1.38092	0.775945
CSLG3_110106368	4.21564	4.1802	5.31677	5.09023	5.57165	5.00809	4.28358	4.16494	4.13796	2.42001	2.5298	1.15074
CSLG3_110106369	13.5789	15.9597	13.5091	19.5381	17.428	17.6785	15.2718	9.82454	13.063	5.87958	7.12854	6.76095
CSLG3_110099995	7.26848	7.73763	7.63472	11.1654	11.6307	11.6318	5.94432	4.72002	6.92883	3.28608	4.27044	3.03771
CSLG3_novel.1735	1.10386	0.739734	1.43619	2.27602	1.76811	1.7857	1.03368	1.35373	1.62474	0.36069	0.523259	0.343024
CSLG3_novel.1487	1.97865	1.90624	1.66913	3.37944	2.46681	2.76098	1.0024	1.439	2.05089	0.766816	2.00238	1.21543
CSLD4_110115924	0.717442	0.794867	1.50566	1.65702	1.05062	1.66852	1.04845	1.05935	0.848009	0.476643	0.591593	0.516255

## Sheet: Table S2
#ID	gene_name	DcWOX12_1	DcWOX12_2	DcWOX12_3	WT_1	WT_2	WT_3
AT5G17810	WOX12	32.5637	88.4648	49.1061	0.022565	0.112313	0.05361
AT3G11260	WOX5	38.2857	13.2945	17.7672	1.25953	1.73561	0.834235
AT2G33880	WOX9	24.0149	17.3876	26.7775	0.210675	0.195137	0.509992
AT2G28610	WOX3	1.9945	2.80706	0.848233	0.321189	0.137924	0.638773
AT2G17950	WUS	2.88293	1.2967	2.19204	0	0.061848	0.073443
AT5G10510	PLT3	44.248	31.3522	38.9776	6.41505	7.87383	8.44886
AT1G51190	PLT2	1.49591	2.12918	1.40568	0.572435	0.801924	0.76067
AT3G54320	WRI1	17.2184	27.1305	29.5793	11.908	10.8166	13.2879
AT1G12980	DRN	1.94415	4.89898	1.27442	0.146242	0.473148	0.384842
AT2G42430	LBD16	34.9243	23.9204	24.6573	0.605415	0.412934	0.155035
AT2G42440	LBD17	11.9146	13.0019	9.06051	0.181061	0.156806	0
AT2G45420	LBD18	16.0966	10.5899	13.9883	0.172049	0.571868	0.206908
AT2G25180	ARR12	22.092	24.8543	15.2044	10.7939	10.3041	10.5862
AT4G16110	ARR2	12.3486	16.4233	15.2061	6.85432	7.00617	6.05849
AT3G26790	FUS3	0.773938	0.97995	0.996657	0.11872	0.079293	0.249188
AT3G24650	ABI3	38.4536	15.8817	29.5454	0.058655	0.01271	0
AT2G40220	ABI4	53.0422	54.4199	50.8277	0	0	0.006161
AT5G18450	DREB2G	36.1707	2.83615	12.4956	0	0	0
